# Supplementary material for: Identification of a novel Dlg2 isoform differentially expressed in IFNβ-producing plasmacytoid dendritic cells
Source: PubMed Central journal article supplement (PMC6389146; doi:10.1186/s12864-018-4573-5), 2018-03-12
Supplement: 12864_2018_4573_MOESM1_ESM.pdf [file 12864_2018_4573_MOESM1_ESM.pdf]

Additional file 1

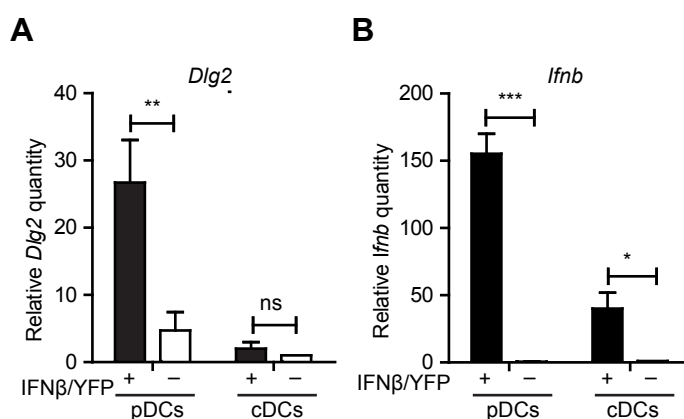

**Additional file 1.** Expression of *Dlg2* in IFN $\beta$ /YFP-producing pDCs and cDCs. BM-derived pDCs and cDCs were differentiated in Flt3L cultures. BM-derived cells were left untreated or stimulated with 1 $\mu$ M CpG 2216 ODN complexed to DOTAP and separated into IFN $\beta$ /YFP-positive vs. IFN $\beta$ /YFP-negative cells by FACS sorting. Expression of *Dlg2* (A) and *Ifnb* (B) were analyzed by qPCR. Data shown are relative quantities ( $2^{-\Delta\Delta Ct}$ ) combined from three independent experiments. Black bars indicate the expression of *Dlg2* (A) or *Ifnb* (B) in the IFN $\beta$ /YFP-producing cells whereas white bars represent the expression of *Dlg2* (A) or *Ifnb* (B) in the IFN $\beta$ /YFP-non-producing cells. Data shown are mean values  $\pm$  SEM. Differences between groups were tested using Two-way ANOVA followed by Bonferroni posttests. ns:  $P > 0.05$ , \*:  $P < 0.05$ , \*\*:  $P < 0.01$ , \*\*\*:  $P < 0.001$ .
